# Supplementary material
Source: publisher site journal article supplement (https://www.spandidos-publications.com/4364/downloadSupplementary)
Supplement: Supplementary file 1 [file downloadSupplementary]

## Sheet: Sheet1
Table SIII Clinicopathological details of the patients.
ID	Sex	Age	Pathological diagnosis	Stage	DNA	ADCY5	ELAVL4	KIF5A	MED12L	NRG1	mRNA	ADCY5	ELAVL4	KIF5A	MED12L	NRG1
729861	Male	56	CRC with T2DM	T3aN0M0	729861C	0.15978	0.76933	0.00879	0.03974	0.69015	729861Ca	4.31e-05	4.16584e-05	4.70193e-05	9.55771e-06	0.000272428
					729861N	0.20425	0.26484	0.0097	0.01674	0.13905	729861N	0.000274959	0.000374746	9.47088e-05	2.07928e-05	0.00326625
733651	Female	60	CRC with T2DM	T3aN1aM0	733651C	0.19064	0.36165	0.01081	0.03464	0.44431	733651Ca	3.86347e-05	8.67329e-05	8.10973e-05	1.48603e-05	6.09136e-05
					733651N	0.18952	0.29185	0.0106	0.01657	0.21098	733651N	0.000376642	0.0004695	9.46022e-05	1.42515e-05	0.00294391
734537	Male	64	CRC with T2DM	T3aN2aM0	737531C	0.24774	0.58527	0.03122	0.17744	0.52642	734537Ca	1.51635e-05	9.35992e-06	6.416e-05	1.81288e-05	0.000283829
					737531N	0.20924	0.33464	0.01182	0.01508	0.22388	734537N	0.000292187	0.000447409	8.6261e-05	1.95055e-05	0.0043524
737531	Male	76	CRC with T2DM	T4aN0M0	743537C	0.25354	0.32836	0.00962	0.02287	0.19169	737531Ca	3.26716e-05	5.93674e-05	1.49091e-05	1.06066e-05	0.00271254
					743537N	0.19442	0.27028	0.01036	0.01667	0.12751	737531N	0.000492438	0.000957612	0.000218648	2.06377e-05	0.00240685
744194	Male	52	CRC with T2DM	T3aN0M0	744194C	0.15324	0.66742	0.01416	0.01845	0.4959	744194Ca	2.04839e-05	5.96954e-05	1.2358e-05	1.62585e-05	0.00138619
					744194N	0.1796	0.26198	0.01039	0.01405	0.12581	744194N	0.000290615	0.000146954	5.0371e-05	8.39127e-06	0.00398229
746443	Male	63	CRC	T3aN0M0	746532C	0.18552	0.18618	0.01104	0.02212	0.10582	746443Ca	4.44991e-05	0.000194483	3.30571e-05	5.87936e-06	0.000245631
					746532N	0.17424	0.29462	0.01055	0.01536	0.14719	746443N	0.000221898	0.000351142	6.43531e-05	9.45811e-06	0.00184909
746532	Male	67	CRC	T3aN0M0	747166C	0.21994	0.36407	0.0102	0.01789	0.18768	746532Ca	0.00012957	0.000152557	6.66974e-05	3.72502e-05	0.00341057
					747166N	0.19923	0.32071	0.00939	0.0156	0.16721	746532N	0.00304985	0.00459132	0.00165225	7.06015e-05	0.000859125
747166	Female	75	CRC with T2DM	T3aN0M0	748337C	0.19369	0.32012	0.01039	0.01979	0.20551	747166Ca	4.82797e-05	9.97091e-05	3.1452e-05	9.47221e-06	0.00148061
					748337N	0.19145	0.28648	0.0139	0.01963	0.18377	747166N	0.000222156	0.000208061	5.65194e-05	1.23487e-05	0.00460775
748337	Male	57	CRC with T2DM	T3aN0M0	748364C	0.51624	0.56368	0.15524	0.55207	0.46315	748337Ca	0.000477821	0.000614305	0.000136905	3.02149e-05	0.00165216
					748364N	0.18641	0.2683	0.01124	0.01811	0.14789	748337N	0.000549615	0.000637842	0.000189155	2.99463e-05	0.00196557
748364	Male	59	CRC with T2DM	T3aN1M0	748428C	0.33559	0.32569	0.02867	0.06552	0.28445	748364Ca	3.466e-05	8.27196e-05	2.55039e-05	1.13846e-05	0.00013913
					748428N	0.12634	0.12725	0.01117	0.01697	0.07115	748364N	0.000358148	0.000237912	7.84464e-05	1.4761e-05	0.00225115
748428	Male	61	CRC	T3aN0M0	749443C	0.23207	0.7067	0.01035	0.01295	0.53601	748428Ca	6.4852e-05	0.000115293	4.36188e-05	1.91622e-05	0.000127545
					749443N	0.08269	0.05847	0.0118	0.01644	0.04436	748428N	0.000803695	0.00213463	0.000391578	#DIV/0!	0.00124854
750343	Female	72	CRC	T3aN1aM0	750343C	0.23273	0.63744	0.01971	0.01776	0.7343	750343Ca	4.25303e-05	0.00015704	3.84752e-05	1.96808e-05	0.000245725
					750343N	0.17629	0.29746	0.01109	0.0156	0.15694	750343N	0.000474509	0.000753366	0.000147985	2.04099e-05	0.0049132
750370	Male	63	CRC	T3aN0M0	750370C	0.32465	0.58099	0.03004	0.08653	0.39693	750370Ca	2.64631e-05	4.57388e-05	1.42356e-05	6.72496e-06	0.000310483
					750370N	0.18019	0.26712	0.01074	0.01609	0.14986	750370N	0.00272276	0.00306182	0.000637838	7.31925e-05	0.000116794
750517	Male	65	CRC	T3aN0M0	750517C	0.26265	0.43224	0.01884	0.16165	0.41478	750517Ca	2.5789e-05	5.25344e-05	1.7738e-05	8.94276e-06	0.000816515
					750517N	0.18849	0.26024	0.01051	0.01583	0.14876	750517N	0.000207704	0.000833893	5.20185e-05	1.09497e-05	0.00328192
750581	Male	65	CRC	T3aN1aM0	750518C	0.21334	0.3162	0.01293	0.01434	0.19164	750581Ca	0.000338328	0.000625518	0.000232205	3.08918e-05	0.00147647
					750518N	0.08668	0.10703	0.01048	0.01459	0.06033	750581N	0.000329516	0.000477393	9.83423e-05	1.23765e-05	0.00152566
751490	Male	68	CRC	T3aN0M0	751490C	0.18294	0.35927	0.01162	0.02272	0.20895	751490Ca	0.000122146	0.000106895	4.54017e-05	9.50556e-06	0.00103989
					751490N	0.18879	0.27815	0.01042	0.01558	0.13576	751490N	0.000185011	0.000256335	5.58013e-05	8.24151e-06	0.00166305
752226	Male	60	CRC with T2DM	T3N0M0	752226C	0.22319	0.37654	0.01288	0.06795	0.32147	752226Ca	0.000231806	0.000228632	5.42309e-05	5.45184e-05	0.001303
					752226N	0.09166	0.05693	0.0104	0.01667	0.0394	752226N	0.00119103	0.00136654	0.000405313	3.2508e-05	0.00199256
752640	Female	66	CRC	T3aN0M0	752640C	0.171	0.21262	0.01116	0.01392	0.11921	752640Ca	0.000368996	0.000447951	0.000121173	4.76553e-05	0.000326619
					752640N	0.16919	0.281	0.01023	0.01425	0.14867	752640N	0.000322662	0.00023845	9.86607e-05	1.21202e-05	0.00321424
752729	Female	56	CRC	T3aN0M0	752729C	0.17325	0.4647	0.01213	0.04537	0.45627	752729Ca	2.16023e-05	3.88284e-05	1.54569e-05	6.37805e-06	0.00108025
					752729N	0.21157	0.28907	0.01175	0.01765	0.20673	752729N	0.000265961	0.000614392	0.000118044	2.12356e-05	0.00205582
754073	Male	72	CRC	T3aN0M0	754073C	0.18901	0.39445	0.01173	0.0157	0.22411	754073Ca	2.66433e-05	3.46955e-05	0.000150064	0.000208957	0.000728614
					754073N	0.12162	0.16992	0.01208	0.01758	0.09891	754073N	0.000513749	0.000350825	8.99756e-05	1.68736e-05	0.00445328
755313	Male	64	CRC	T4aN2bM0	755313C	0.39568	0.34602	0.0853	0.20881	0.19106	755313Ca	3.01752e-05	9.62023e-05	2.59941e-05	1.47318e-05	0.00100916
					755313N	0.20913	0.29506	0.01072	0.01573	0.15279	755313N	0.000284817	0.000636442	0.000129114	1.48062e-05	0.00277495
755413	Male	72	CRC	T3aN0M0	755413C	0.20833	0.4055	0.01312	0.02814	0.21657	755413Ca	2.55348e-05	9.45272e-05	2.01452e-05	6.76077e-06	0.000582649
					755413N	0.1884	0.33547	0.01164	0.01704	0.17932	755413N	0.000216599	0.000275557	8.67898e-05	6.61836e-06	0.00300874
756868	Female	70	CRC	T4aN2aM0	756868C	0.17388	0.59201	0.01066	0.0132	0.25703	756868Ca	1.51831e-05	3.04922e-05	1.78019e-05	5.17507e-06	0.000219289
					756868N	0.17686	0.22913	0.01	0.01583	0.11235	756868N	0.000302367	0.000367869	0.000175957	2.65701e-05	0.00330729
757790	Male	64	CRC with T2DM	T3N0M0	757790C	0.21316	0.37142	0.01307	0.06071	0.19971	757790Ca	2.97385e-05	0.000134142	3.34228e-05	1.60573e-05	0.00250038
					757790N	0.18065	0.26195	0.0115	0.0175	0.14054	757790N	0.00056616	0.000611391	0.000143671	3.9376e-05	0.00155009
1419825	Female	71	CRC with T2DM	T4N0M0	1419825C	0.19814	0.45791	0.01014	0.05959	0.29412	1419825Ca	0.00051677	0.000451332	0.000345593	5.83741e-05	0.00162181
					1419825N	0.20764	0.31878	0.01245	0.0172	0.20968	1419825N	0.000406471	0.000564127	0.000133182	2.91897e-05	0.00196979
1428672	Female	54	CRC with T2DM	T4N1bM0	1428672C	0.15561	0.60008	0.00972	0.03946	0.30717	1428672Ca	9.54501e-06	0.000105947	1.91833e-05	2.42698e-05	0.000309269
					1428672N	0.21995	0.27797	0.01168	0.01632	0.13484	1428672N	0.000255004	0.000249129	7.09375e-05	1.85103e-05	0.0043757
1432109	Male	65	CRC with T2DM	T4N0M1	1452109C	0.22487	0.32359	0.02187	0.05345	0.21904	1432109Ca	2.47764e-05	4.79438e-05	4.58449e-05	2.63334e-05	0.000180062
					1452109N	0.21769	0.25811	0.01127	0.01763	0.13516	1432109N	0.000182339	0.000314022	5.84948e-05	9.16664e-06	0.00134884
1938631	Male	63	CRC with T2DM	T4N1aM0	1938631C	0.17244	0.37286	0.04003	0.08796	0.3588	1938631Ca	2.09605e-05	4.38831e-05	4.29397e-05	3.70966e-05	0.000643335
					1938631N	0.19178	0.32871	0.01108	0.01529	0.18031	1938631N	3.53076e-05	3.57436e-05	0.000105067	5.6025e-05	0.000652003
